# Supplementary material for: The Influence of Polycation and Counter-Anion Nature on the Properties of Poly(ionic liquid)-Based Membranes for CO2 Separation
Source: MDPI journal article supplement (doi:10.3390/membranes13060539), 2023-05-23
Supplement: s1 [file s1]

# The Influence of Polycation and Counter-anion Nature on the Properties of Poly(ionic liquid)-Based Membranes for CO<sub>2</sub> Separation

Ksenia V. Otvagina<sup>1</sup>, Alexey A. Maslov<sup>1</sup>, Diana G. Fukina<sup>2</sup>, Anton N. Petukhov<sup>1,3</sup>, Yulia B. Malysheva<sup>4</sup>, Andrey V. Vorotyntsev<sup>1</sup>, Tatyana S. Sazanova<sup>3,5,6</sup>, Artem A. Atlaskin<sup>3</sup>, Alexander A. Kapinos<sup>1</sup>, Alexandra V. Barysheva<sup>1</sup>, Sergey S. Suvorov<sup>1</sup>, Ivan D. Zanozin<sup>1</sup>, Egor S. Dokin<sup>1</sup>, Ilya V. Vorotyntsev<sup>3</sup> and Olga V. Kazarina<sup>1,5,6,\*</sup>

- <sup>1</sup> Chemical Engineering Laboratory, Research Institute for Chemistry, N.I. Lobachevsky State University of Nizhny Novgorod, 23 Gagarin Avenue, 603950 Nizhny Novgorod, Russia; k.v.otvagina@gmail.com (K.V.O.); antopetukhov@gmail.com (A.N.P.); an.vorotyntsev@gmail.com (A.V.V.); kapinos98@gmail.com (A.A.K.); aleksandra.barysheva@gmail.com (A.V.B.); e-dokin@yandex.ru (E.S.D.)
- <sup>2</sup> Research Institute for Chemistry, N.I. Lobachevsky State University of Nizhny Novgorod, 23 Gagarin Avenue, 603950 Nizhny Novgorod, Russia; dianafuk@yandex.ru
- <sup>3</sup> Laboratory of SMART Polymeric Materials and Technologies, Mendeleev University of Chemical Technology, 9 Miusskaya Square, 125047 Moscow, Russia; atlaskin@gmail.com (A.A.A.); ilyavorotyntsevv@gmail.com (I.V.V.)
- <sup>4</sup> Organic Chemistry Department, N.I. Lobachevsky State University of Nizhny Novgorod, 23 Gagarin Avenue, 603950 Nizhny Novgorod, Russia
- <sup>5</sup> Laboratory of Membrane and Catalytic Processes, Nizhny Novgorod State Technical University n.a. R.E. Alekseev, 24 Minin Street, 603950 Nizhny Novgorod, Russia
- <sup>6</sup> Laboratory of Ionic Materials, Mendeleev University of Chemical Technology, 9 Miusskaya Square, 125047 Moscow, Russia
- \* Correspondence: olga\_kazarina@list.ru; Tel.: +7-920-001-7305

To evaluate the densities of PILs, mixtures of liquids with different densities were used. In Table S1 components of the mixtures are listed for each PIL.

**Table S1.** Mixtures of liquids used for PILs density evaluation.

| Polymer                 | Component 1 | $\rho@20^{\circ}\text{C}$ , g/cm <sup>3</sup> | Component 2          | $\rho@20^{\circ}\text{C}$ , g/cm <sup>3</sup> |
|-------------------------|-------------|-----------------------------------------------|----------------------|-----------------------------------------------|
| pVBCl                   | water       | 0.9982                                        | glycerol             | 1.2636                                        |
| pVBPylCl                | dioxane     | 1.0363                                        | chloroform           | 1.4892                                        |
| pVBmimCl                | dioxane     | 1.0363                                        | chloroform           | 1.4892                                        |
| pVBPylBF <sub>4</sub>   | dioxane     | 1.0363                                        | chloroform           | 1.4892                                        |
| pVBmimBF <sub>4</sub>   | dioxane     | 1.0363                                        | chloroform           | 1.4892                                        |
| pVBPylPF <sub>6</sub>   | chloroform  | 1.4892                                        | carbon tetrachloride | 1.5942                                        |
| pVBmimPF <sub>6</sub>   | chloroform  | 1.4892                                        | carbon tetrachloride | 1.5942                                        |
| pVBPylTf <sub>2</sub> N | dioxane     | 1.0363                                        | chloroform           | 1.4892                                        |
| pVBmimTf <sub>2</sub> N | dioxane     | 1.0363                                        | chloroform           | 1.4892                                        |

All synthesized PILs were identified by means of Nuclear Magnetic Resonance Spectroscopy (NMR) and Attenuated Total Reflectance Fourier Transforms Infrared Spectroscopy

(ATR-FTIR). NMR data is represented in Table S1 and ATR-FTIR spectra are shown in Figures S1-S6.

**Table S2.** NMR data

|                                                                                                                                                                                                                                                                                                                                                                                                                                                                                                                                                                                                                                                                                                                                                                                                                         |
|-------------------------------------------------------------------------------------------------------------------------------------------------------------------------------------------------------------------------------------------------------------------------------------------------------------------------------------------------------------------------------------------------------------------------------------------------------------------------------------------------------------------------------------------------------------------------------------------------------------------------------------------------------------------------------------------------------------------------------------------------------------------------------------------------------------------------|
| <p><b>pVBmimCl</b> <math>^1\text{H}</math> NMR (400 MHz, <math>\text{D}_2\text{O}</math>, <math>\delta</math> in ppm): 8.89 (br s, 1H, ArH imidazole), 7.47 – 7.01 (br m, 2H, ArH imidazole + 2H, ArH), 6.58 (br s, 2H, ArH), 5.33 (br s, 2H, <math>\text{C}_6\text{H}_4\text{-CH}_2\text{-N}</math>), 3.79 (br s, 3H, <math>\text{CH}_3</math>), 2.05 – 0.90 (br m, 3H, <math>\text{-CH}_2\text{-CH-}</math>). FT-IR (KBr), <math>\nu</math> (<math>\text{cm}^{-1}</math>): 3145, 3077, 3027, 2923, 2852 (<math>\text{CH}_2</math>, CH), 1572, 1559, 1512, 1453, 1423, 1384 (<math>\text{C}=\text{C}</math>, <math>\text{C}=\text{N}</math>). <math>M_n=27300</math>; PDI=1.86.</p>                                                                                                                                    |
| <p><b>pVBmimBF<sub>4</sub></b> <math>^1\text{H}</math> NMR (400 MHz, <math>\text{DMSO-d}_6</math>, <math>\delta</math> in ppm): <math>\delta</math> 9.04 (br s, 1H, ArH imidazole), 7.75 – 7.22 (br m, 2H, ArH imidazole), 7.07 (br s, 2H, ArH), 6.43 (br s, 2H, ArH), 5.22 (br s, 2H, <math>\text{C}_6\text{H}_4\text{-CH}_2\text{-N}</math>), 3.81 (br s, 3H, <math>\text{CH}_3</math>), 2.35 – 0.31 (m, 3H, <math>\text{-CH}_2\text{-CH-}</math>). FT-IR (KBr), <math>\nu</math> (<math>\text{cm}^{-1}</math>): 3159, 3115, 3028, 2926, 2852 (<math>\text{CH}_2</math>, CH), 1573, 1515, 1457, 1427, 1389 (<math>\text{C}=\text{C}</math>, <math>\text{C}=\text{N}</math>), 1050 (<math>\text{BF}_4</math>). <math>M_n = 33200</math>; PDI = 2.04.</p>                                                               |
| <p><b>pVBmimPF<sub>6</sub></b> <math>^1\text{H}</math> NMR (400 MHz, <math>\text{DMSO-d}_6</math>, <math>\delta</math> in ppm): <math>\delta</math> 9.75 (br s, 1H, ArH imidazole), 7.59 – 7.97 (br m, 2H, ArH imidazole), 7.25 (br s, 2H, ArH), 6.34 (br s, 2H, ArH), 5.46 (s, 2H, <math>\text{C}_6\text{H}_4\text{-CH}_2\text{-N}</math>), 3.85 (s, 3H, <math>\text{CH}_3</math>), 1.93 – 0.78 (br m, 3H, <math>\text{-CH}_2\text{-CH-}</math>). FT-IR (KBr), <math>\nu</math> (<math>\text{cm}^{-1}</math>): 3162, 3119, 3031, 2927, 2853 (<math>\text{CH}_2</math>, CH), 1576, 1563, 1515, 1455, 1427, 1392 (<math>\text{C}=\text{C}</math>, <math>\text{C}=\text{N}</math>), 830, 560 (<math>\text{PF}_6</math>). <math>M_n = 39900</math>; PDI = 2.04.</p>                                                        |
| <p><b>pVBmimTf<sub>2</sub>N</b> <math>^1\text{H}</math> NMR (400 MHz, <math>\text{DMSO-d}_6</math>, <math>\delta</math> in ppm): <math>\delta</math> 9.19 (br s, 1H, ArH imidazole), 7.62 (br s, 1H, ArH imidazole), 7.45 (br s, 1H, ArH imidazole), 7.00 (br s, 2H, ArH), 6.38 (s, 2H, ArH), 5.29 (br s, 2H, <math>\text{C}_6\text{H}_4\text{-CH}_2\text{-N}</math>), 3.83 (br s, 3H, <math>\text{CH}_3</math>), 1.84 – 0.85 (br m, 3H, <math>\text{-CH}_2\text{-CH-}</math>). FT-IR (KBr), <math>\nu</math> (<math>\text{cm}^{-1}</math>): 3163, 3118, 3097, 3031, 2961, 2929, 2852 (<math>\text{CH}_2</math>, CH), 1577, 1561, 1516, 1457, 1429 (<math>\text{C}=\text{C}</math>, <math>\text{C}=\text{N}</math>), 1354, 1196, 1137, 1058 (<math>\text{Tf}_2\text{N}</math>). <math>M_n=55700</math>; PDI = 2.04.</p> |
| <p><b>pVBPyCl</b> <math>^1\text{H}</math> NMR (400 MHz, <math>\text{D}_2\text{O}</math>, <math>\delta</math> in ppm). 8.89 (br s, 2H, <i>o</i>-H, <math>\text{C}_6\text{H}_5\text{N}</math>), 8.44 – 8.18 (br m, 1H, <i>p</i>-H, <math>\text{C}_6\text{H}_5\text{N}</math>), 8.01 – 7.72 (m, 2H, <i>m</i>-H, <math>\text{C}_6\text{H}_5\text{N}</math>), 7.27 (s, 2H, ArH), 6.53 (s, 2H, ArH), 5.78 (s, 2H, <math>\text{C}_6\text{H}_4\text{-CH}_2\text{-N}</math>), 1.46 (br m, 3H, <math>\text{-CH}_2\text{-CH-}</math>). FT-IR (KBr), <math>\nu</math> (<math>\text{cm}^{-1}</math>): 3428 (<math>\text{H}_2\text{O}</math>), 3128, 3088, 3065, 2924, 2855 (<math>\text{CH}_2</math>, CH), 1612, 1580, 1501, 1485, 1450, 1426 (<math>\text{C}=\text{C}</math>). <math>M_n = 20200</math>; PDI=1.86.</p>              |
| <p><b>pVBPyBF<sub>4</sub></b> <math>^1\text{H}</math> NMR (400 MHz, <math>\text{DMSO-d}_6</math>, <math>\delta</math> in ppm): 9.09 (br s, 2H, <i>o</i>-H, <math>\text{C}_6\text{H}_5\text{N}</math>), 8.54 (br s, 1H, <i>p</i>-H, <math>\text{C}_6\text{H}_5\text{N}</math>), 8.10 (br s, 2H, <i>m</i>-H, <math>\text{C}_6\text{H}_5\text{N}</math>), 7.21 (br s, 2H, ArH), 6.45 (d br s, 2H, ArH), 5.74 (br s, 2H, <math>\text{C}_6\text{H}_4\text{-CH}_2\text{-N}</math>), 1.78 – 0.77 (m, 3H <math>\text{-CH}_2\text{-CH-}</math>). FT-IR (KBr), <math>\nu</math> (<math>\text{cm}^{-1}</math>):</p>                                                                                                                                                                                                                |

---

3428 (H<sub>2</sub>O), 3138, 3100, 3053, 2929, 2854 (CH<sub>2</sub>, CH), 1614, 1582, 1505, 1489, 1452, 1426 (C = C), 1054 (BF<sub>4</sub>).  $M_n$  = 24700; PDI = 1.86.

---

**pVBP<sub>6</sub>PyPF<sub>6</sub>** <sup>1</sup>H NMR (400 MHz, DMSO-d<sub>6</sub>,  $\delta$  in ppm): 9.35 – 8.97 (m, 2H, *o*-H, C<sub>6</sub>H<sub>5</sub>N), 8.64 – 8.42 (m, 1H, *p*-H, C<sub>6</sub>H<sub>5</sub>N), 8.23 – 7.98 (m, 2H, *m*-H, C<sub>6</sub>H<sub>5</sub>N), 7.21 (br s, 2H, ArH), 6.35 (br s, 2H, ArH), 5.77 (br s, 2H, C<sub>6</sub>H<sub>4</sub>-CH<sub>2</sub>-N), 1.76 – 0.73 (m, 3H –CH<sub>2</sub>-CH–). FT-IR (KBr),  $\nu$  (cm<sup>-1</sup>): 3428 (H<sub>2</sub>O), 3141, 3100, 3070, 2928, 2854 (CH<sub>2</sub>, CH), 1614, 1585, 1503, 1490, 1453, 1429 (C = C), 828, 557 (PF<sub>6</sub>).  $M_n$  = 29800; PDI = 1.86.

---

**pVBP<sub>6</sub>PyTf<sub>2</sub>N** <sup>1</sup>H NMR (400 MHz, DMSO-d<sub>6</sub>,  $\delta$  in ppm): 9.00 (br s, 2H, *o*-H, C<sub>6</sub>H<sub>5</sub>N), 8.57 (br s, 1H, *p*-H, C<sub>6</sub>H<sub>5</sub>N), 8.11 (br s, 2H, *m*-H, C<sub>6</sub>H<sub>5</sub>N), 7.07 (br s, 2H, ArH), 6.32 (br s, 2H, ArH), 5.64 (br s, 2H, C<sub>6</sub>H<sub>4</sub>-CH<sub>2</sub>-N), 2.16 – 0.44 (m, 3H –CH<sub>2</sub>-CH–). FT-IR (KBr),  $\nu$  (cm<sup>-1</sup>): 3428 (H<sub>2</sub>O), 3141, 3095, 3053, 2927, 2855 (CH<sub>2</sub>, CH), 1612, 1582, 1501, 1488, 1455, 1431 (C = C), 1361, 1194, 1136, 1058 (Tf<sub>2</sub>N).  $M_n$  = 41600; PDI = 1.86.

---

ATR-FTIR spectra represents the results obtained for pure PILs as well as for PILs after exposure to CO<sub>2</sub> and after CO<sub>2</sub> desorption. Spectra for pVBmimTf<sub>2</sub>N and pVBP<sub>6</sub>PyTf<sub>2</sub>N are shown in the main text.

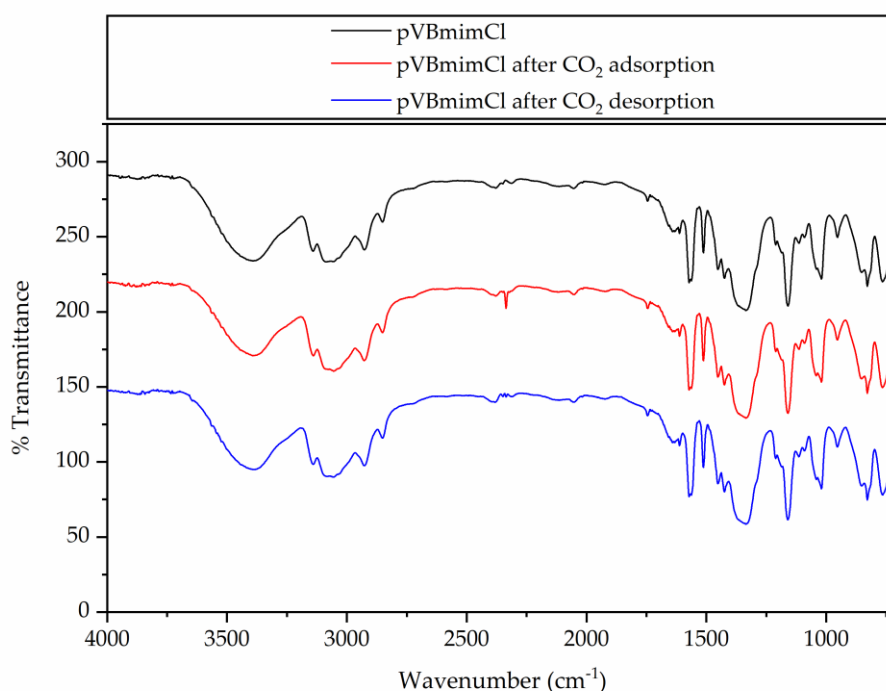

**Figure S1.** ATR-FTIR spectra for pVBmimCl

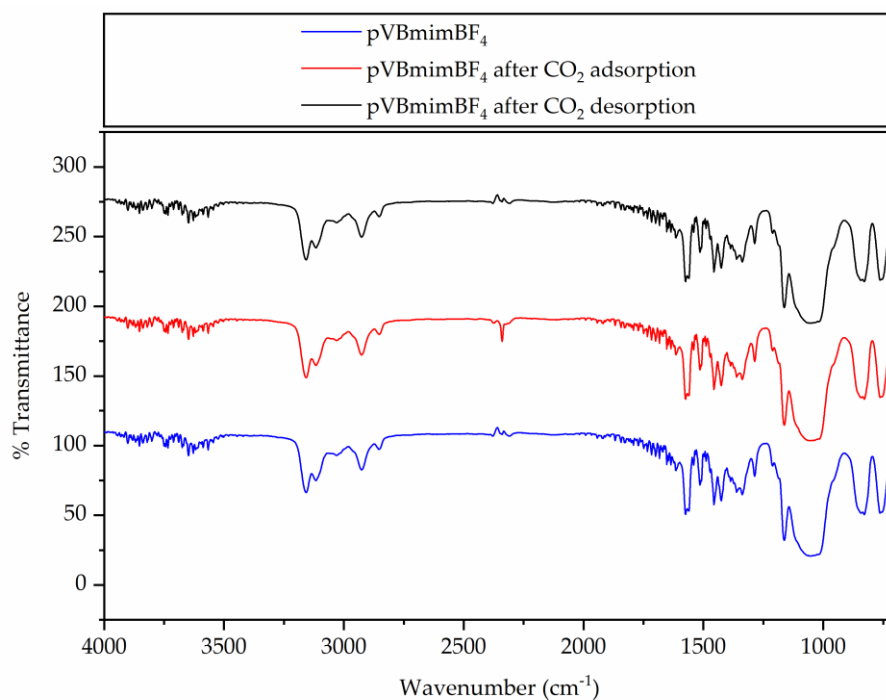

**Figure S2.** ATR-FTIR spectra for pVBmimBF<sub>4</sub>

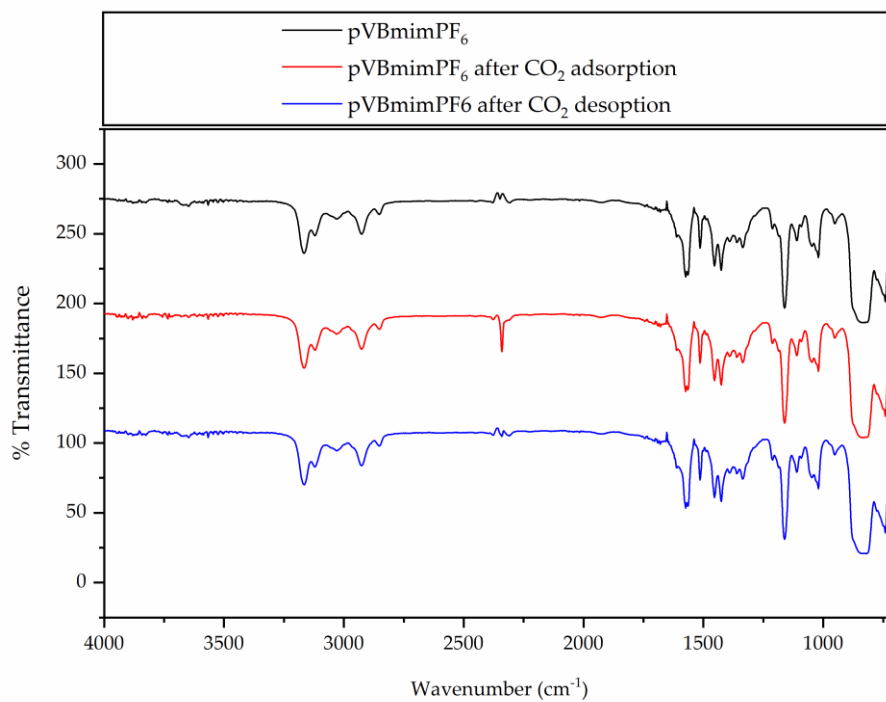

**Figure S3.** ATR-FTIR spectra for pVBmimPF<sub>6</sub>

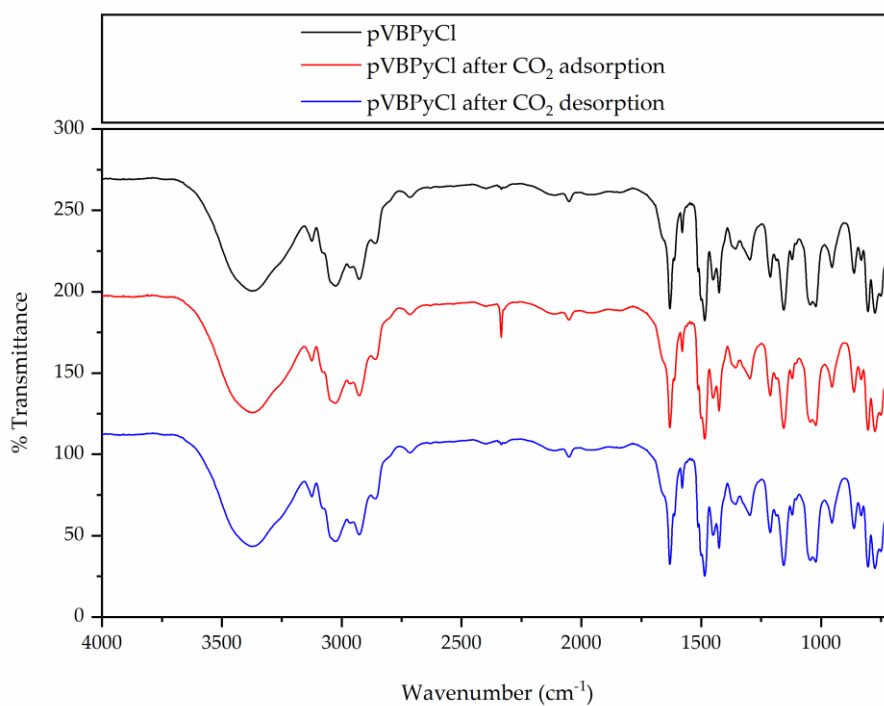

**Figure S4.** ATR-FTIR spectra for pVBPYCl

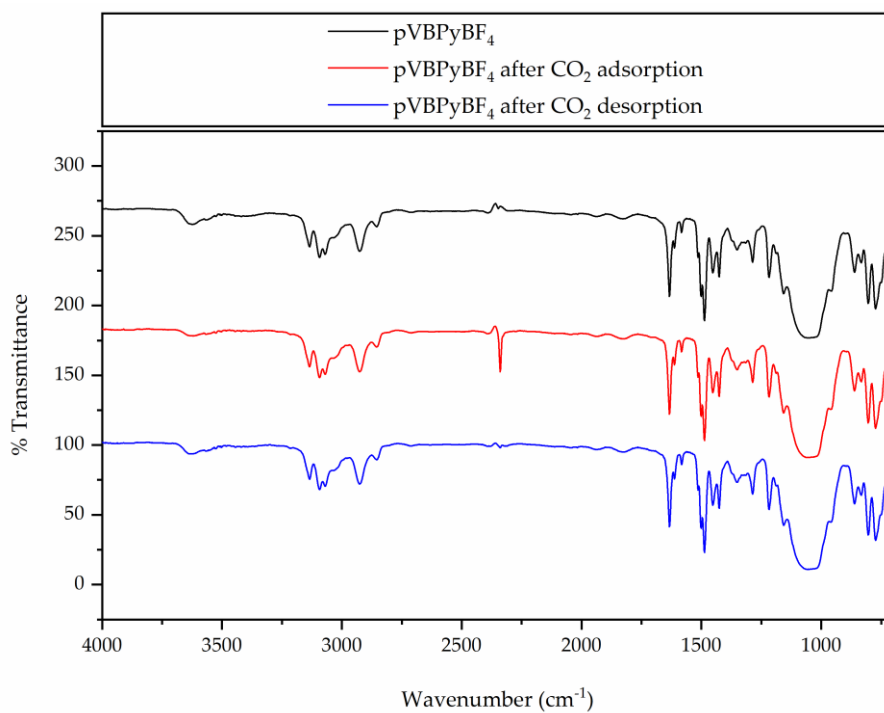

**Figure S5.** ATR-FTIR spectra for pVBPYBF<sub>4</sub>

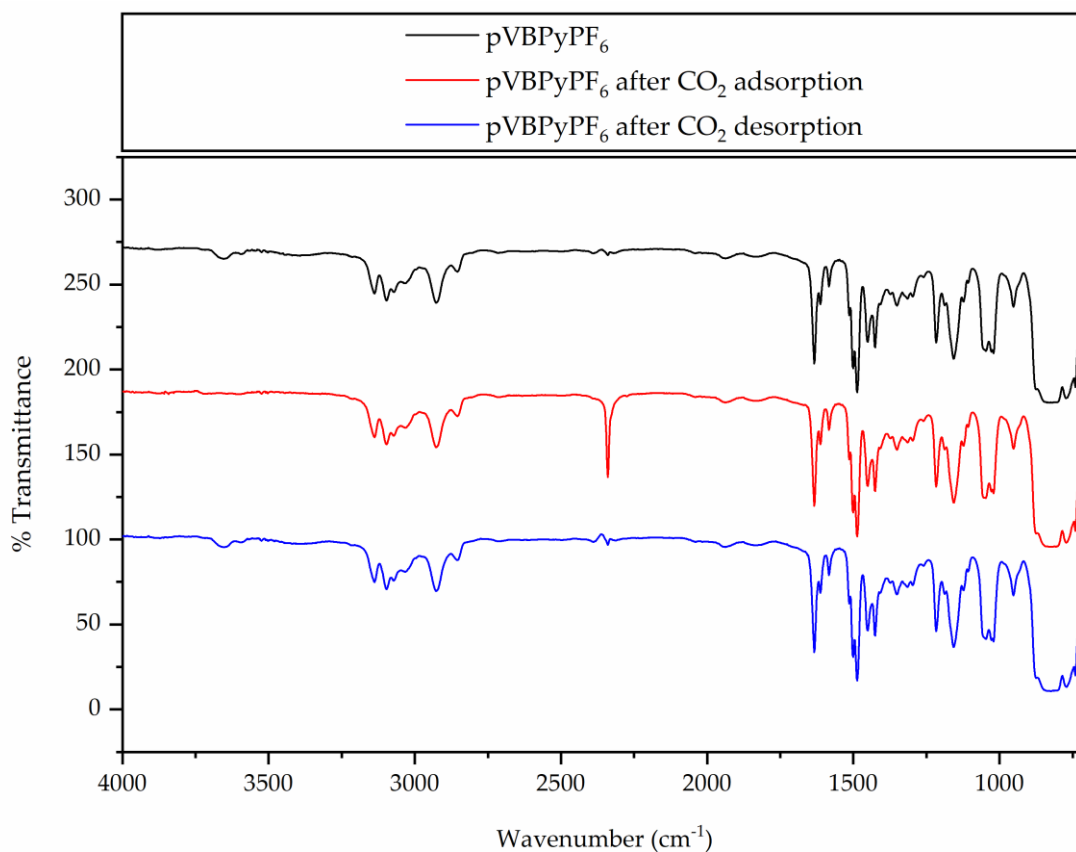

**Figure S6.** ATR-FTIR spectra for pVBPfPF<sub>6</sub>

The selected experimental data of time course of pressure difference in permeation cell is represented in Figure S7.

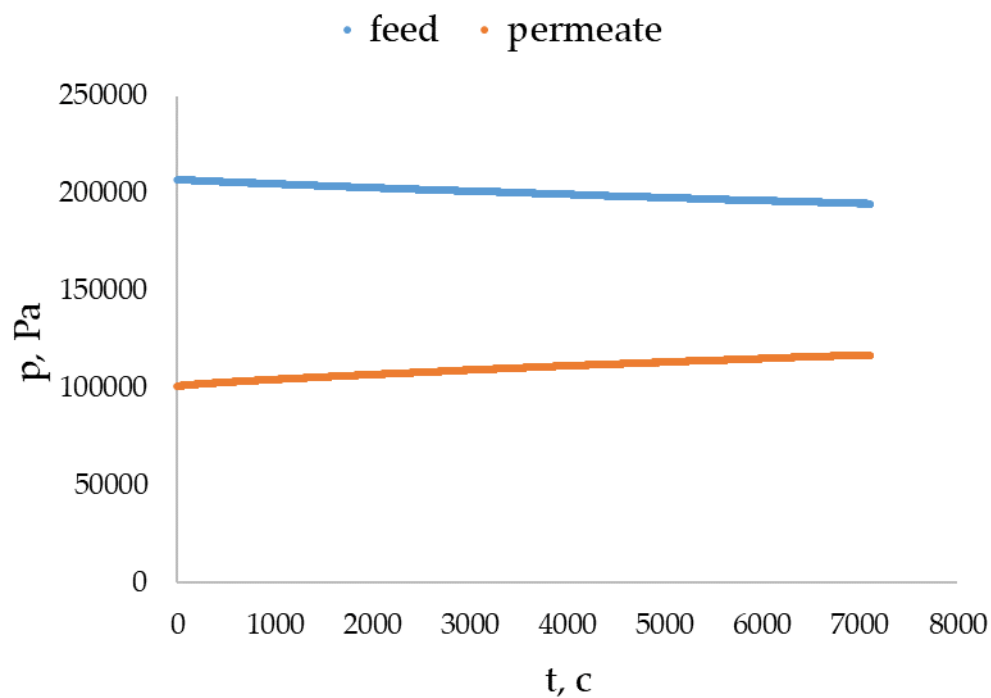

**Figure S7.** The time course of CO<sub>2</sub> pressure in permeation cell for a membrane with pVBmimTf<sub>2</sub>N selective layer.

Supplementary information for SEM images is listed in Table S3.

**Table S3.** Supplementary information for SEM images.

| Polymer                 | Information for cross-section image                                        | Information for surface image                                              |
|-------------------------|----------------------------------------------------------------------------|----------------------------------------------------------------------------|
| pVBC                    | BET-C, operating voltage 20 kV, WD 14.80 mm x200, High-P.C.15.0, High vac. | BET-C, operating voltage 20 kV, WD 10.00 mm x200, High-P.C.15.0, High vac. |
| pVBmimBF <sub>4</sub>   | BET-C, operating voltage 20 kV, WD 11.30 mm x200, High-P.C.30.0, 40 Pa.    | BET-C, operating voltage 20 kV, WD 9.7 mm x100, High-P.C.30.0, 39 Pa.      |
| pVBmimPF <sub>6</sub>   | BET-C, operating voltage 20 kV, WD 10.10 mm x200, High-P.C.30.0, 41 Pa.    | BET-C, operating voltage 20 kV, WD 9.8 mm x200, High-P.C.30.0, 40 Pa.      |
| pVBmimTf <sub>2</sub> N | BET-C, operating voltage 20 kV, WD 10.40 mm x200, High-P.C.30.0, 40 Pa.    | BET-C, operating voltage 20 kV, WD 9.9 mm x200, High-P.C.15.0, High vac.   |
| pVBPyBF <sub>4</sub>    | BET-C, operating voltage 20 kV, WD 8.80 mm x200, High-P.C.20.0, 45 Pa.     | BET-C, operating voltage 20 kV, WD 9.8 mm x100, High-P.C.40.0, 45 Pa.      |
| pVBPyPF <sub>6</sub>    | BET-C, operating voltage 20 kV, WD 8.50 mm x200, High-P.C.20.0, 45 Pa.     | BET-C, operating voltage 20 kV, WD 9.9 mm x200, High-P.C.30.0, 44 Pa.      |
| pVBPyTf <sub>2</sub> N  | BET-C, operating voltage 20 kV, WD 8.80 mm x200, High-P.C.20.0, 45 Pa.     | BET-C, operating voltage 20 kV, WD 9.8 mm x200, High-P.C.40.0, 44 Pa.      |
